# Supplementary material for: Predicting dry weight change in Hemodialysis patients using machine learning
Source: PubMed Central journal article supplement (PMC10308746; doi:10.1186/s12882-023-03248-5), 2023-06-29
Supplement: 12882_2023_3248_MOESM1_ESM.pdf [file 12882_2023_3248_MOESM1_ESM.pdf]

Table S1. Missing values for each variable.

|                                      | <u>All (n=314)</u> |           | <u>Train data (n=237)</u> |           | <u>Test data (n=77)</u> |           |
|--------------------------------------|--------------------|-----------|---------------------------|-----------|-------------------------|-----------|
| <b>Dialysis records</b>              |                    |           |                           |           |                         |           |
| Body weight before dialysis          | 0.0064             |           | 0.0063                    |           | 0.0060                  |           |
| Body weight after dialysis           | 0.0064             |           | 0.0063                    |           | 0.0059                  |           |
| Water removal                        | 0.0067             |           | 0.0067                    |           | 0.0063                  |           |
| Membrane area of dializer            | 0.0001             |           | 0.0001                    |           | 0.0000                  |           |
| Dialysis time                        | 0.0064             |           | 0.0063                    |           | 0.0059                  |           |
| Blood flow rate                      | 0.0065             |           | 0.0064                    |           | 0.0061                  |           |
| Cardiothoracic ratio                 | 0.0435             |           | 0.0433                    |           | 0.0435                  |           |
| Blood pressure                       | 0.0065             |           | 0.0065                    |           | 0.0059                  |           |
| Pulse rate                           | 0.0065             |           | 0.0065                    |           | 0.0059                  |           |
| Body temperature                     | 0.8058             |           | 0.8029                    |           | 0.8145                  |           |
| <b>Medical record entries</b>        |                    |           |                           |           |                         |           |
| Pulmonary congestion                 | 0.9995             |           | 0.9994                    |           | 0.9998                  |           |
| Pleural effusion                     | 0.9985             |           | 0.9987                    |           | 0.9979                  |           |
| Oxygen administration                | 0.9995             |           | 0.9995                    |           | 0.9995                  |           |
| Edema                                | 0.9954             |           | 0.9957                    |           | 0.9944                  |           |
| Hypotension                          | 0.9999             |           | 0.9999                    |           | 0.9999                  |           |
| <b>Laboratory test results</b>       |                    |           |                           |           |                         |           |
|                                      | (pre-HD)           | (post-HD) | (pre-HD)                  | (post-HD) | (pre-HD)                | (post-HD) |
| White blood cell count               | 0.8258             | 0.9999    | 0.8270                    | 0.9999    | 0.8221                  | 0.9999    |
| Red blood cell count                 | 0.8258             | 0.9999    | 0.8270                    | 0.9999    | 0.8221                  | 0.9999    |
| Hemoglobin                           | 0.9291             | 0.9999    | 0.9292                    | 0.9999    | 0.9288                  | 1.0000    |
| Hematocrit                           | 0.8258             | 0.9999    | 0.8270                    | 0.9999    | 0.8221                  | 0.9999    |
| Platelet count                       | 0.8258             | 0.9999    | 0.8270                    | 0.9999    | 0.8221                  | 0.9999    |
| Reticulocytes                        | 0.9251             | N.A.      | 0.9251                    | N.A.      | 0.9249                  | N.A.      |
| Total protein                        | 0.8390             | 0.9999    | 0.8395                    | 0.9999    | 0.8372                  | 1.0000    |
| Albumin                              | 0.8378             | 0.9999    | 0.8387                    | 0.9999    | 0.8349                  | 1.0000    |
| Alkaline phosphatase                 | 0.9143             | 1.0000    | 0.9146                    | 0.9999    | 0.9135                  | 1.0000    |
| Cholinesterase                       | 0.9511             | N.A.      | 0.9519                    | N.A.      | 0.9485                  | N.A.      |
| Blood urea nitrogen                  | 0.8381             | 0.9272    | 0.8384                    | 0.9272    | 0.8372                  | 0.9273    |
| Creatinine                           | 0.8381             | 0.9272    | 0.8384                    | 0.9272    | 0.8372                  | 0.9273    |
| Sodium                               | 0.8361             | 0.9272    | 0.8364                    | 0.9272    | 0.8351                  | 0.9272    |
| Potassium                            | 0.8361             | 0.9272    | 0.8364                    | 0.9272    | 0.8351                  | 0.9272    |
| Chlorine                             | 0.8361             | 0.9272    | 0.8364                    | 0.9272    | 0.8351                  | 0.9272    |
| Calcium                              | 0.8399             | 0.9272    | 0.8407                    | 0.9272    | 0.8376                  | 0.9273    |
| Inorganic phosphorus                 | 0.8416             | 0.9272    | 0.8427                    | 0.9272    | 0.8381                  | 0.9273    |
| Intact parathyroid hormone           | 0.9262             | N.A.      | 0.9263                    | N.A.      | 0.9261                  | N.A.      |
| Iron                                 | 0.9257             | N.A.      | 0.9257                    | N.A.      | 0.9257                  | N.A.      |
| Unsaturated iron binding capacity    | 0.9260             | N.A.      | 0.9261                    | N.A.      | 0.9259                  | N.A.      |
| Ferritin                             | 0.9259             | N.A.      | 0.9260                    | N.A.      | 0.9257                  | N.A.      |
| Brain natriuretic peptide            | 0.9960             | 0.9997    | 0.9957                    | 0.9997    | 0.9968                  | 0.9997    |
| C-reactive protein (pre- or post-HD) | 0.8916             |           | 0.8933                    |           | 0.8862                  |           |

There are no missing value for age, gender, height, name of primary disease, prescription, injected drugs during dialysis, dry weight or dialysis mode. The dates of introduction of dialysis for three patients included in the train data were not available.

Values are expressed as ratio to the number of dialysis records. HD, hemodialysis.
